# Supplementary material for: Beyond Maternity: Quantifying the Holistic Disease Burden and Systemic Neglect of Women’s Health in Yemen
Source: Research Square preprint supplement (doi:10.21203/rs.3.rs-8444298/v1), 2026-01-02
Supplement: Supplementary file 1 [file 889f787c87d4119fb06d4379.docx]

## Appendix A: Supplementary Data Tables

### Table A1: GBD 2021 Leading Causes of Death and Disability (YLD) in Yemen

| Rank | Cause of Death (Age-Standardized) | Cause of Disability (YLD) |
| --- | --- | --- |
| 1 | Ischemic heart disease | Dietary iron deficiency |
| 2 | COVID-19 | Low back pain |
| 3 | Stroke | Depressive disorders |
| 4 | Hypertensive heart disease | Headache disorders |
| 5 | Conflict and terrorism | Anxiety disorders |
| 6 | Neonatal disorders | Gynecological diseases |

### Table A2: Health Facility Availability for Key Services (HeRAMS 2023)

| Service Category | % Facilities (n=3,507) | Notes |
| --- | --- | --- |
| Maternal & newborn health (comprehensive) | 20% | Includes ANC, delivery, emergency obstetric care, postnatal care |
| NCD and mental health services (full) | 21% | Includes screening, management, counseling for NCDs and MH |
| Antenatal care (any form) | 45% | Variable quality; effective coverage lower |
| Mental health integrated into PHC | <5% | Minimal integration at primary health care level |
| Clinical management of rape | 5% | Severe gap in GBV-responsive care |
